# Supplementary material
Source: HighWire-hosted journal article supplement (https://www.cmajopen.ca/highwire/filestream/84942/field_highwire_adjunct_files/6/CMAJOpen-2019-0213-5-at.pdf)
Supplement: CMAJOpen-2019-0213-5-at.pdf [file CMAJOpen-2019-0213-5-at.pdf]

Cost of admission and cost ratios for most common reasons for hospitalization, stratified by diabetes status, adjusted for inflation

| Most Common Reason for Hospitalization | Cost of Admission, median (CAD), [95% CI] |                              |                              | Cost Ratio (95% CI) |
|----------------------------------------|-------------------------------------------|------------------------------|------------------------------|---------------------|
|                                        | Overall                                   | Diabetes                     | No Diabetes                  |                     |
| Heart Failure                          | 6770.48 [5047.20, 10104.49]               | 6851.98 [5096.84, 11560.03]  | 6723.30 [5031.50, 9602.32]   | 1.02 (1.01, 1.03)   |
| Urinary tract infection                | 5145.70 [3977.37, 7410.50]                | 5577.45 [4076.69, 8045.51]   | 4634.91 [3962.41, 7208.94]   | 1.20 (1.14, 1.27)   |
| Stroke                                 | 7355.00 [5743.66, 12574.87]               | 8404.53 [5904.26, 13107.54]  | 7066.04 [5634.68, 12372.07]  | 1.19 (1.14, 1.24)   |
| Pneumonia                              | 6114.52 [4416.36, 9120.16]                | 6344.93 [4587.21, 10494.21]  | 5981.79 [4386.71, 8756.61]   | 1.06 (1.04, 1.08)   |
| COPD                                   | 6241.85 [4536.67, 9180.97]                | 6483.32 [4832.27, 10702.85]  | 6172.94 [4493.54, 8327.72]   | 1.05 (1.02, 1.09)   |
| Delirium                               | 12915.20 [9737.58, 17822.03]              | 13284.69 [9824.13, 18385.15] | 12830.71 [9715.67, 17698.16] | 1.04 (0.99, 1.08)   |
| Acute renal failure                    | 6415.78 [4396.47, 10391.56]               | 6418.20 [4396.47, 10755.40]  | 6262.64 [4396.47, 10199.11]  | 1.02 (0.94, 1.12)   |
| Sepsis                                 | 10369.57 [6289.93, 19677.98]              | 11027.79 [6772.87, 20758.73] | 10310.51 [6146.65, 19410.86] | 1.07 (0.99, 1.15)   |
| Soft tissue and bone infections        | 6746.86 [4182.97, 11169.84]               | 8919.03 [4778.89, 16014.23]  | 5942.45 [4129.35, 10315.17]  | 1.50 (1.36, 1.65)   |
| Electrolyte disorders                  | 3848.28 [3067.48, 5940.36]                | 4477.29 [3086.07, 5984.76]   | 3708.55 [3062.17, 5927.83]   | 1.21 (1.11, 1.32)   |

*COPD (Chronic Obstructive Pulmonary Disease). CAD (Canadian Dollars). 95% CI (95% confidence interval)*
